# Supplementary material
Source: publisher figshare collection journal article supplement (https://acs.figshare.com/ndownloader/files/11216063)
Supplement: Supplementary file 1 [file 11216063]

[Supporting Information]

## **Magnetically Characterized Molecular Lubrication between Biofunctionalized Surfaces**

Xinghao Hu<sup>1</sup>, Sri Ramulu Torati<sup>1,2</sup>, Jonghwan Yoon<sup>1</sup>, Byeonghwa Lim<sup>1</sup>, Kunwoo Kim<sup>1</sup>, and  
CheolGi Kim<sup>1\*</sup>

<sup>1</sup>Department of Emerging Materials Science, DGIST, Daegu, 42988, Republic of Korea.

<sup>2</sup>School of Chemical and Biotechnology, SASTRA Deemed University, Thanjavur, 613401,  
India

**KEYWORDS:** *superparamagnetic particle, micromagnet, biofunctionalization, friction,  
magnetic field*

\*Corresponding Author: CheolGi Kim (cgkim@dgist.ac.kr)

## Trajectory simulation of particle motion

The equation of particle motion in liquid medium under net forces is described as following,<sup>1</sup>

$$\delta V \vec{a} = \vec{F}_{mag} + \vec{F}_D = \vec{F}_{mag} + \vec{F}_f + \vec{F}_{vis} \quad (1)$$

In this equation,  $\delta$  is the density of the particle ( $\text{kg m}^{-3}$ ),  $V$  is the volume of the particle ( $\text{m}^3$ ),  $\vec{a}$  is the acceleration of the particle,  $\vec{F}_{mag}$  is the magnetic force,  $\vec{F}_D$  is the drag force (the Stokes force),  $\vec{F}_f$  and  $\vec{F}_{vis}$  are frictional and viscous forces. Thus, in cylindrical coordinate the acceleration of the particle is given by,

$$a_\rho = (F_{mag}^\rho + F_f^\rho + F_{vis}^\rho)/\delta V \quad (2)$$

$$a_\varphi = (F_{mag}^\varphi + F_f^\varphi + F_{vis}^\varphi)/\delta V \quad (3)$$

Subsequently, differences in radial distance ( $\rho$ ) and phase angle ( $\varphi$ ) are given by the time variation ( $\Delta t$ ) as following,

$$\Delta \rho = a_\rho \Delta t^2 \quad (4)$$

$$\Delta \varphi = a_\varphi \Delta t^2 / \rho \quad (5)$$

As a result, the time variation of trajectory in circumferential and radial components of particle motion was numerically obtained using the above equations.

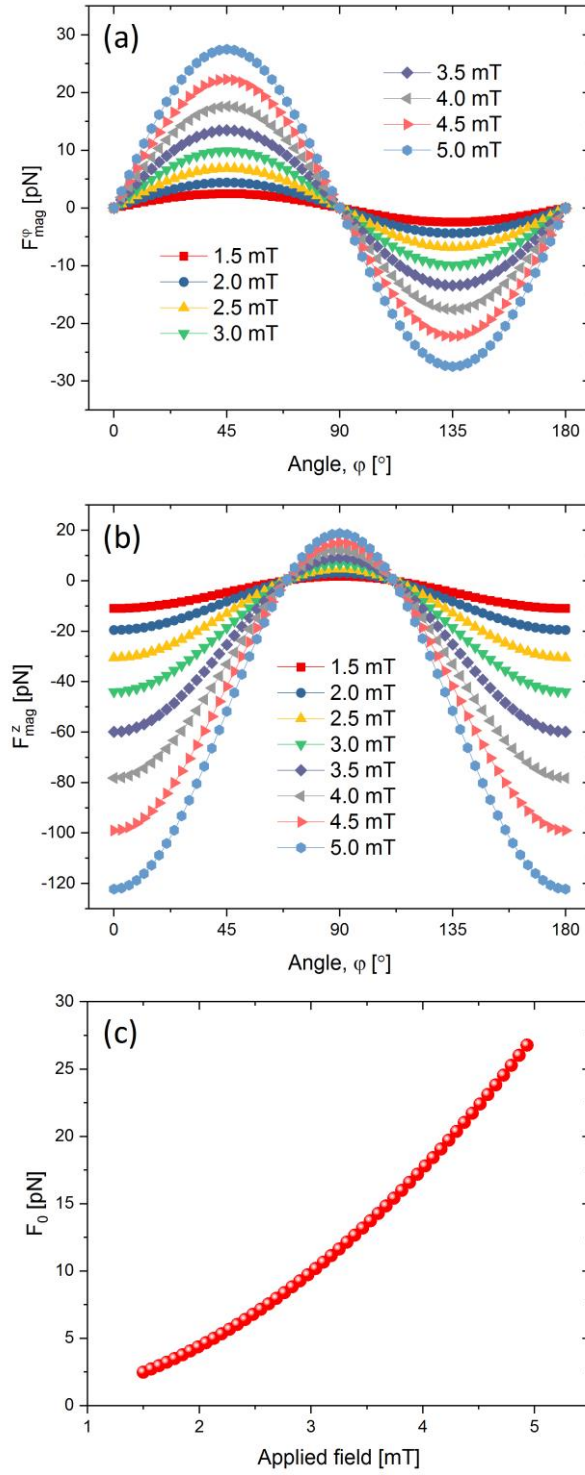

**Figure S1.** (a and b) Angular dependence of the magnetic forces,  $F_{mag}^\phi$  and  $F_{mag}^z$ , on a superparamagnetic particle with a diameter of 2.8  $\mu\text{m}$  and a magnetic susceptibility of 0.7 around a micromagnet under in-plane fields from 1.5 to 5 mT. (c) Magnitude of  $F_0$  as a function of the field strength.

## Reference

- (1) Shevkoplyas, S. S.; Siegel, A. C.; Westervelt, R. M.; Prentiss, M. G.; Whitesides, G. M. The Force Acting on a Superparamagnetic Bead Due to an Applied Magnetic Field. *Lab. Chip* **2007**, 7 (10), 1294–1302.
